# Supplementary material for: Evaluation of Nursery Traits in Japanese Plums on Five Different Rootstocks
Source: MDPI journal article supplement (doi:10.3390/horticulturae9030318), 2023-02-28
Supplement: s1 [file s1]

Archive with 1 entries (1 files):
- horticulturae-2201219-supplementary.pdf
