# Supplementary material for: Evaluation of Nursery Traits in Japanese Plums on Five Different Rootstocks
Source: MDPI journal article supplement (doi:10.3390/horticulturae9030318), 2023-02-28
Supplement: s1 [file s1 › horticulturae-2201219-supplementary.pdf]

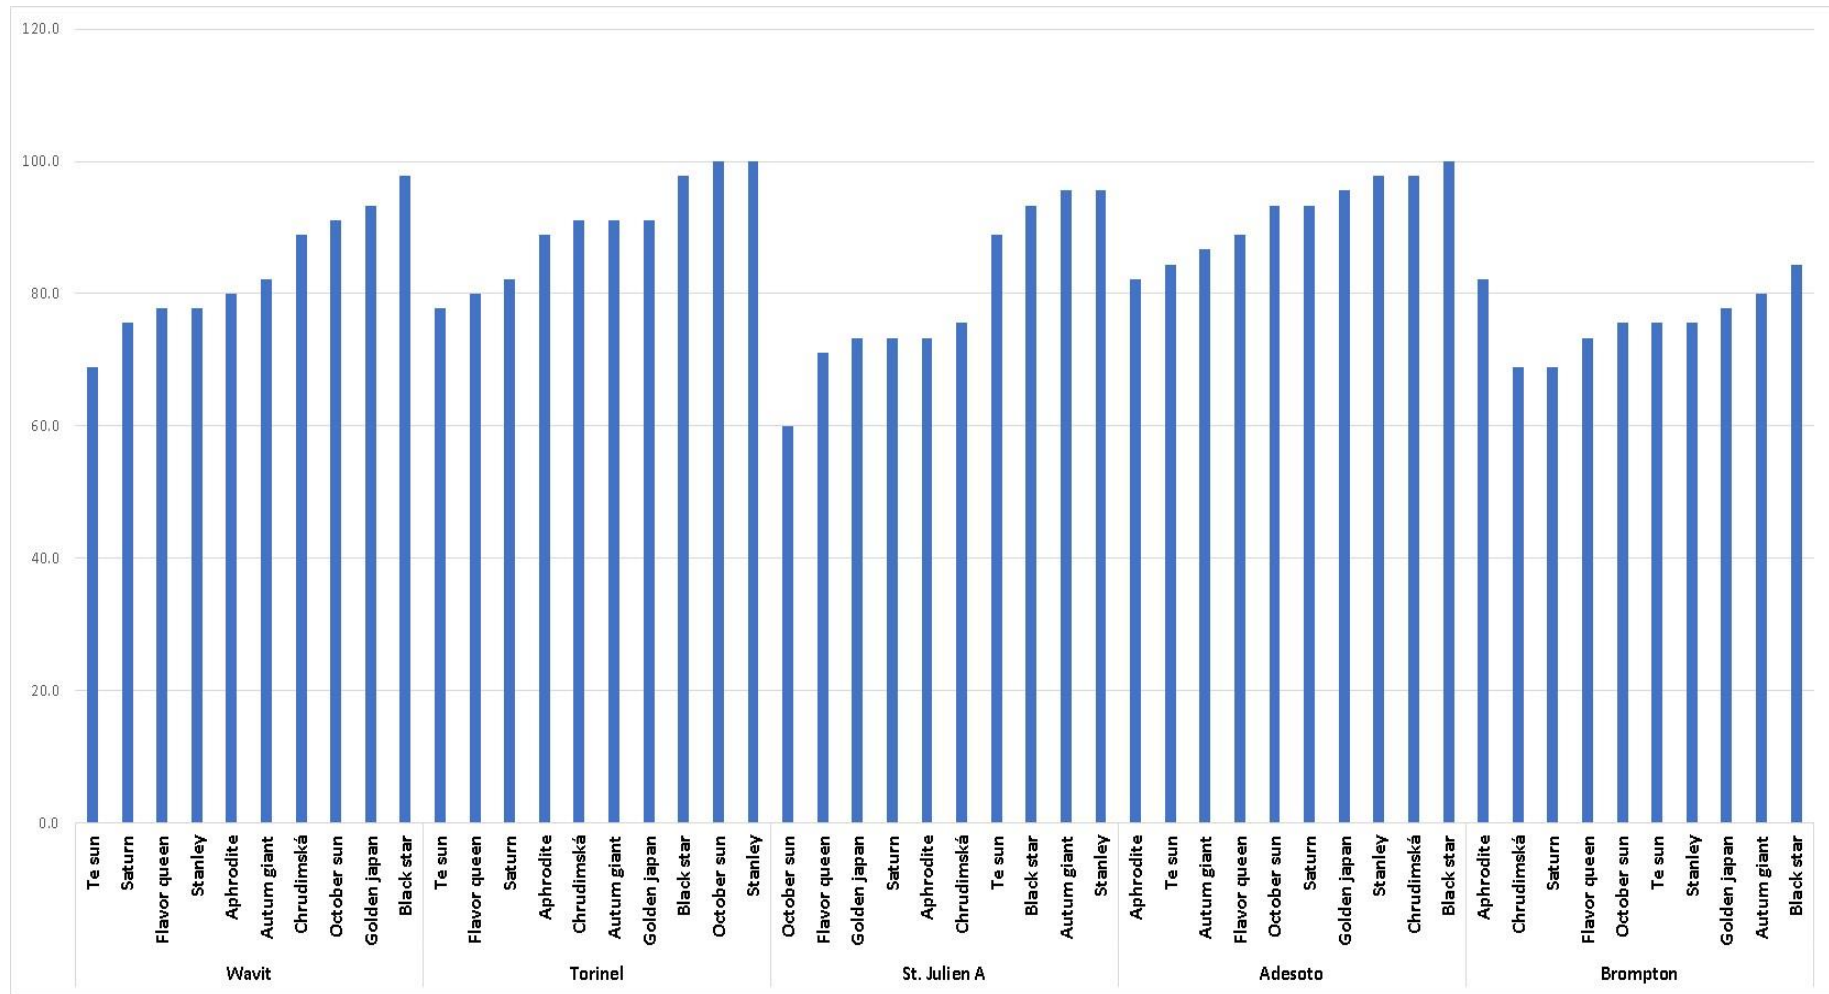

Figure S1: mean affinity (%) values across all rootstock/variety combinations.

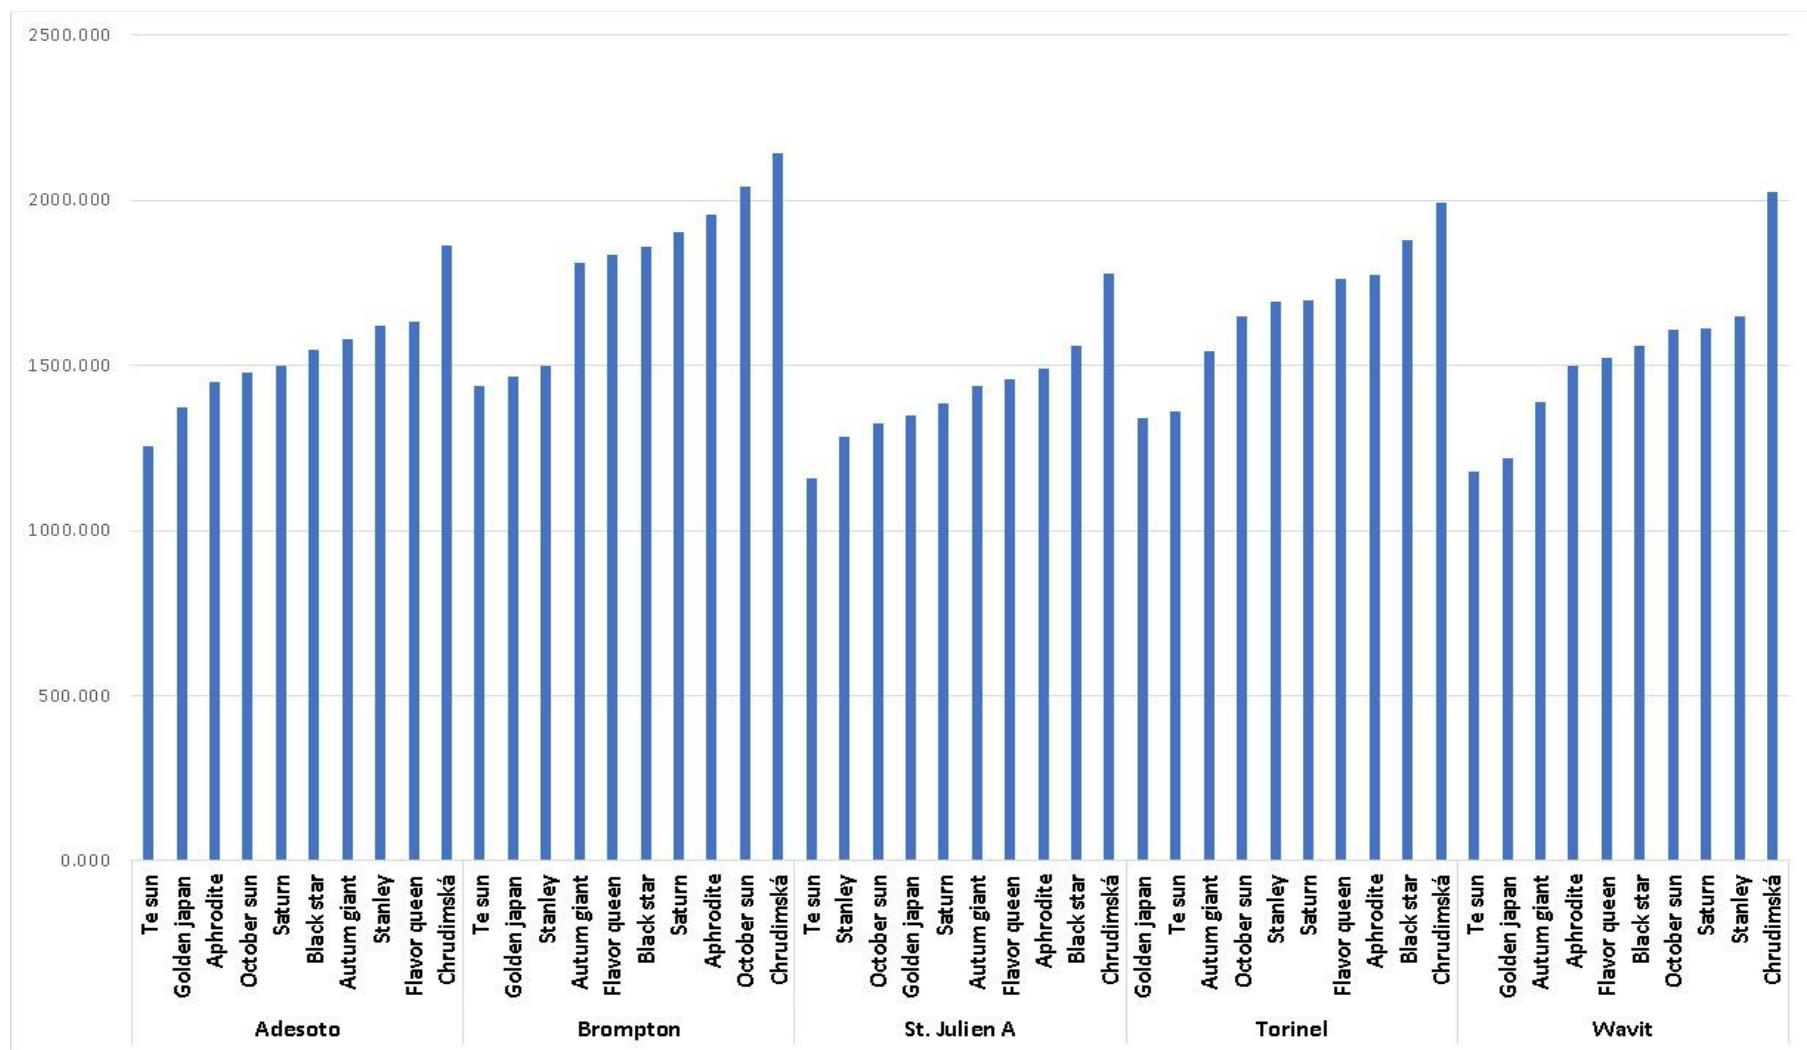

Figure S2: mean highest of saplings (mm) values across all rootstock/variety combinations.

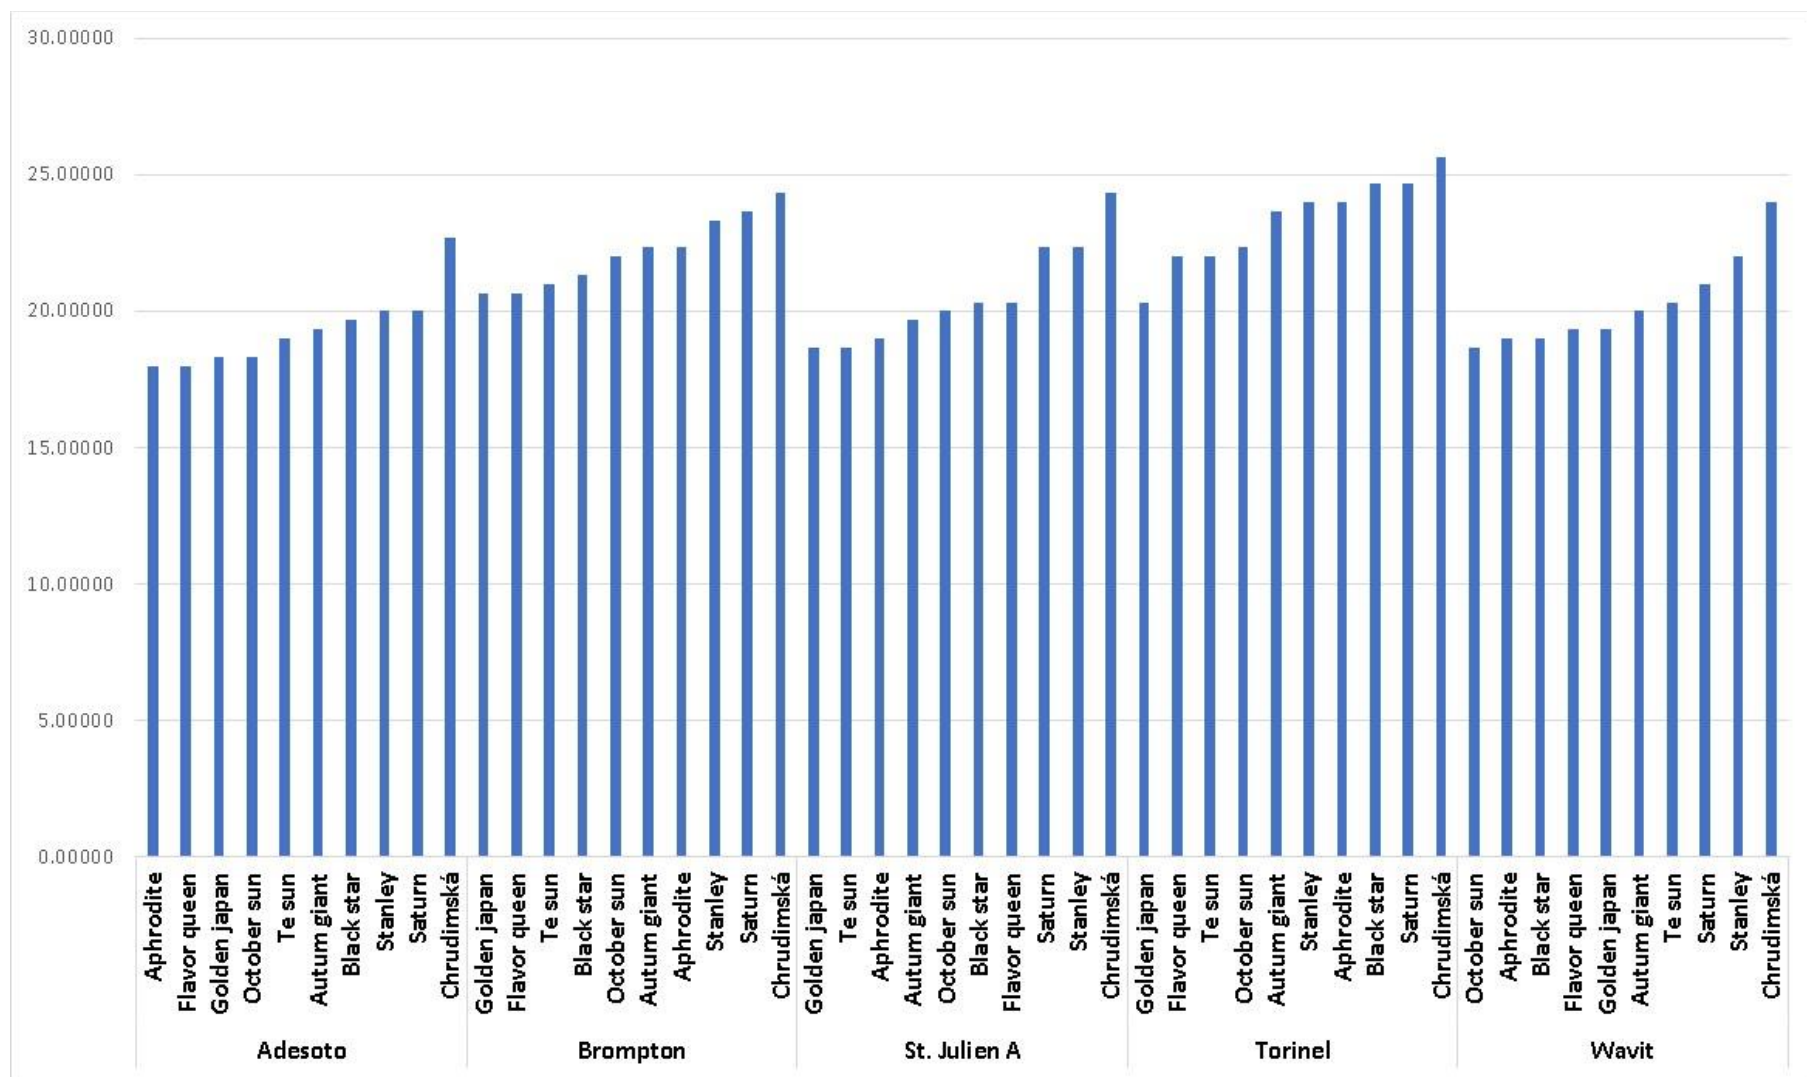

Figure S3: mean root collar diameter of saplings(mm) values across all rootstock/variety combinations.

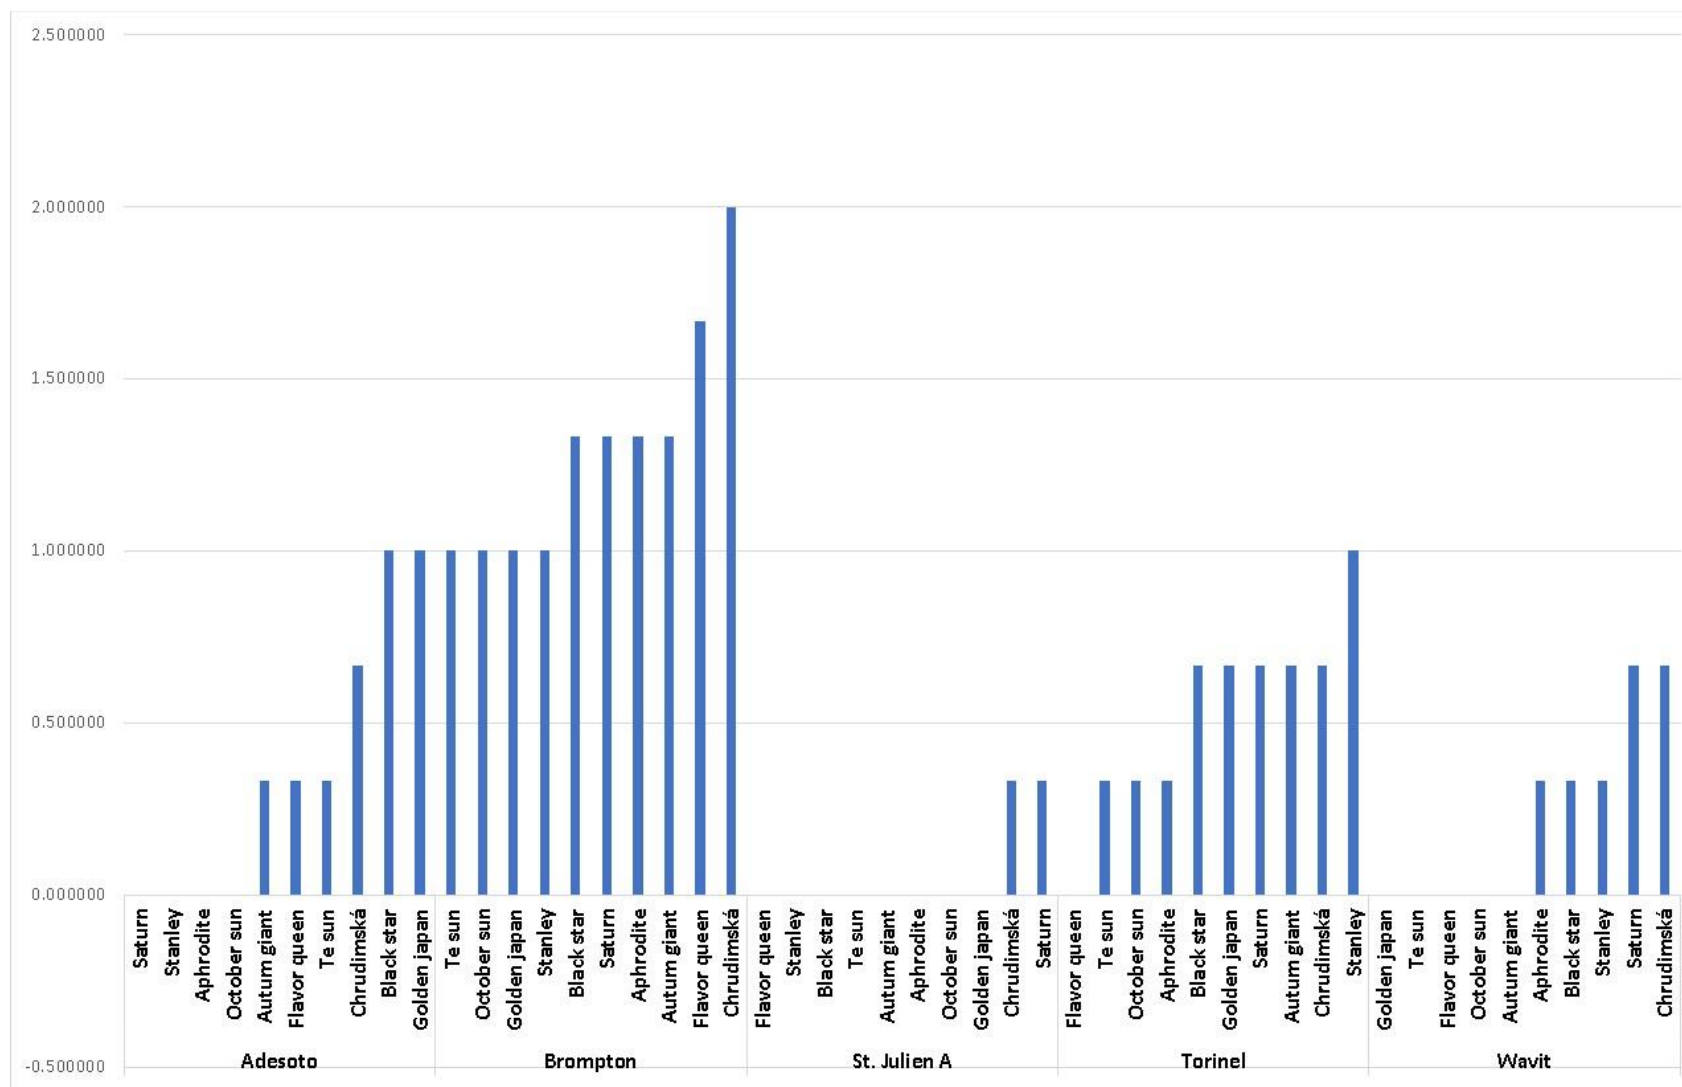

Figure S4: mean number of suckers in sapling (pieces) values across all rootstock/variety combinations.

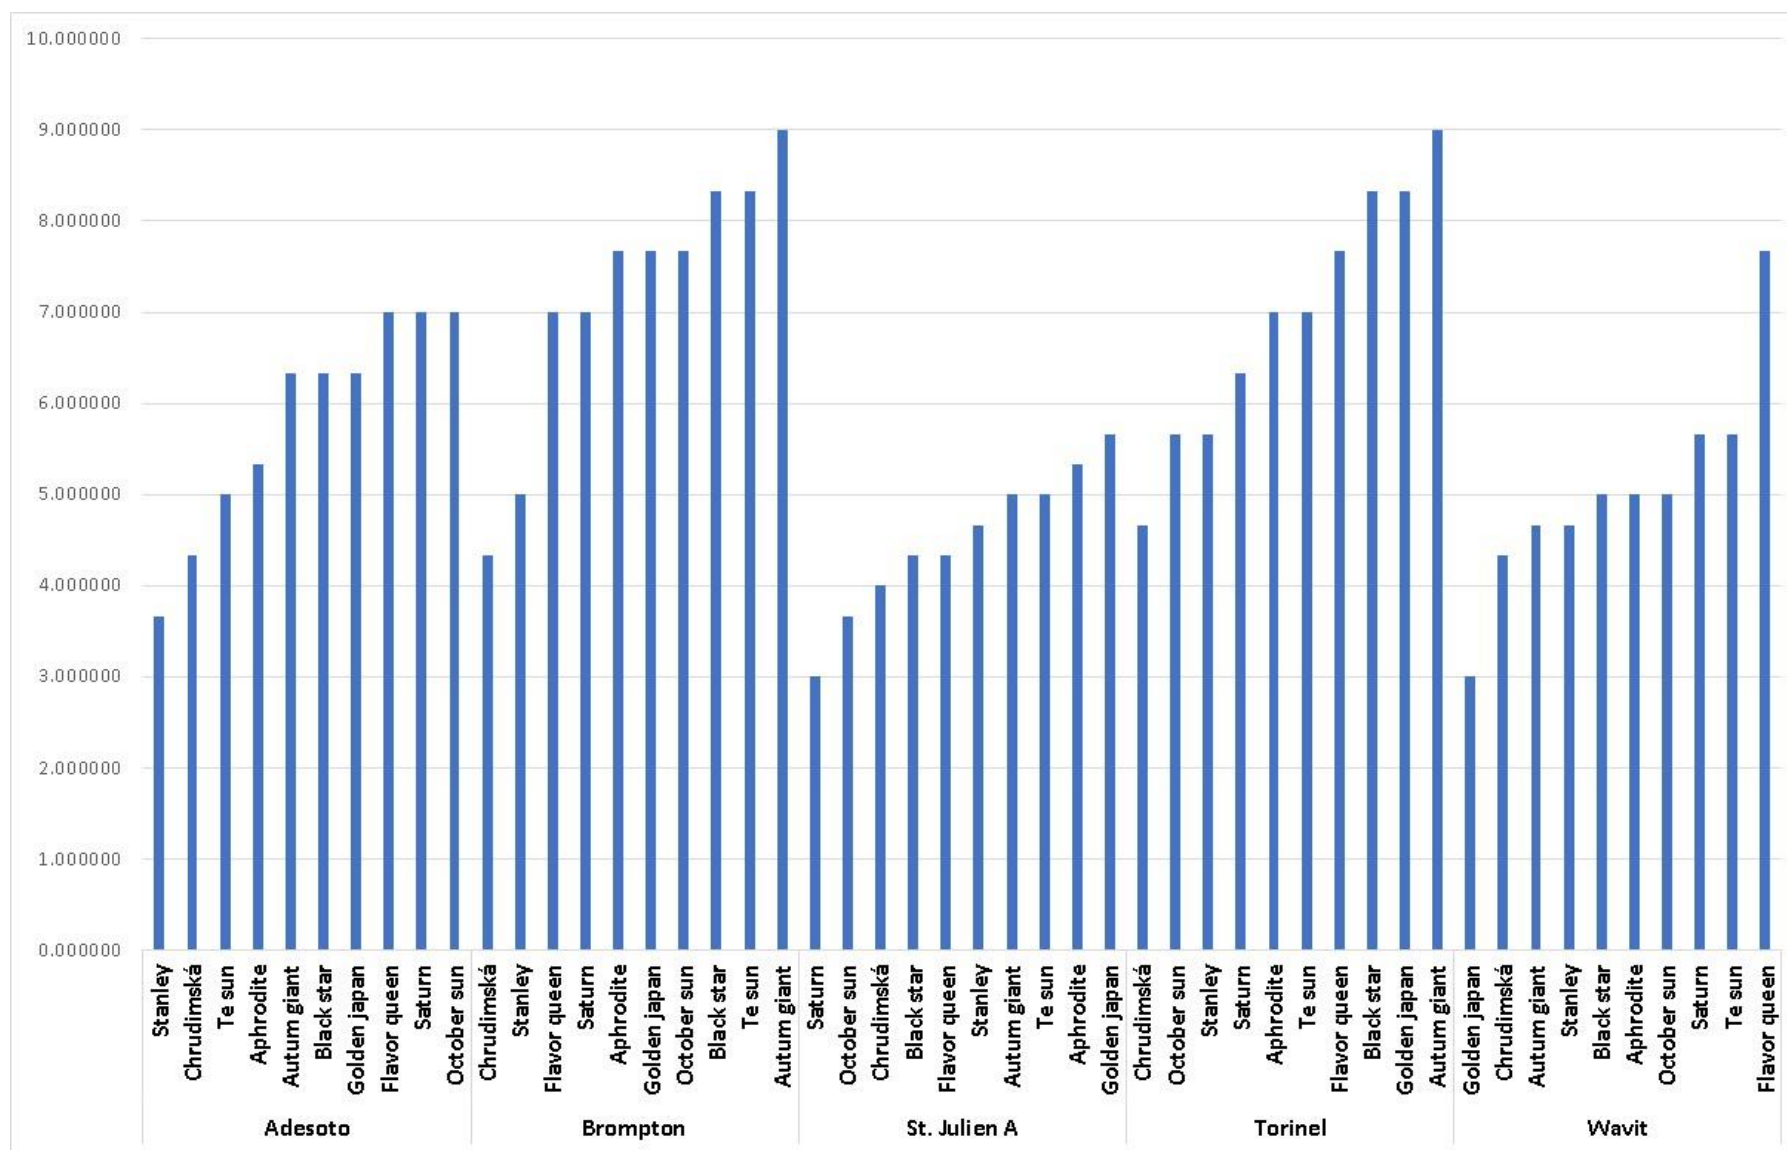

Figure S5: mean intensity of branching in sapling (points) values across all rootstock/variety combinations.

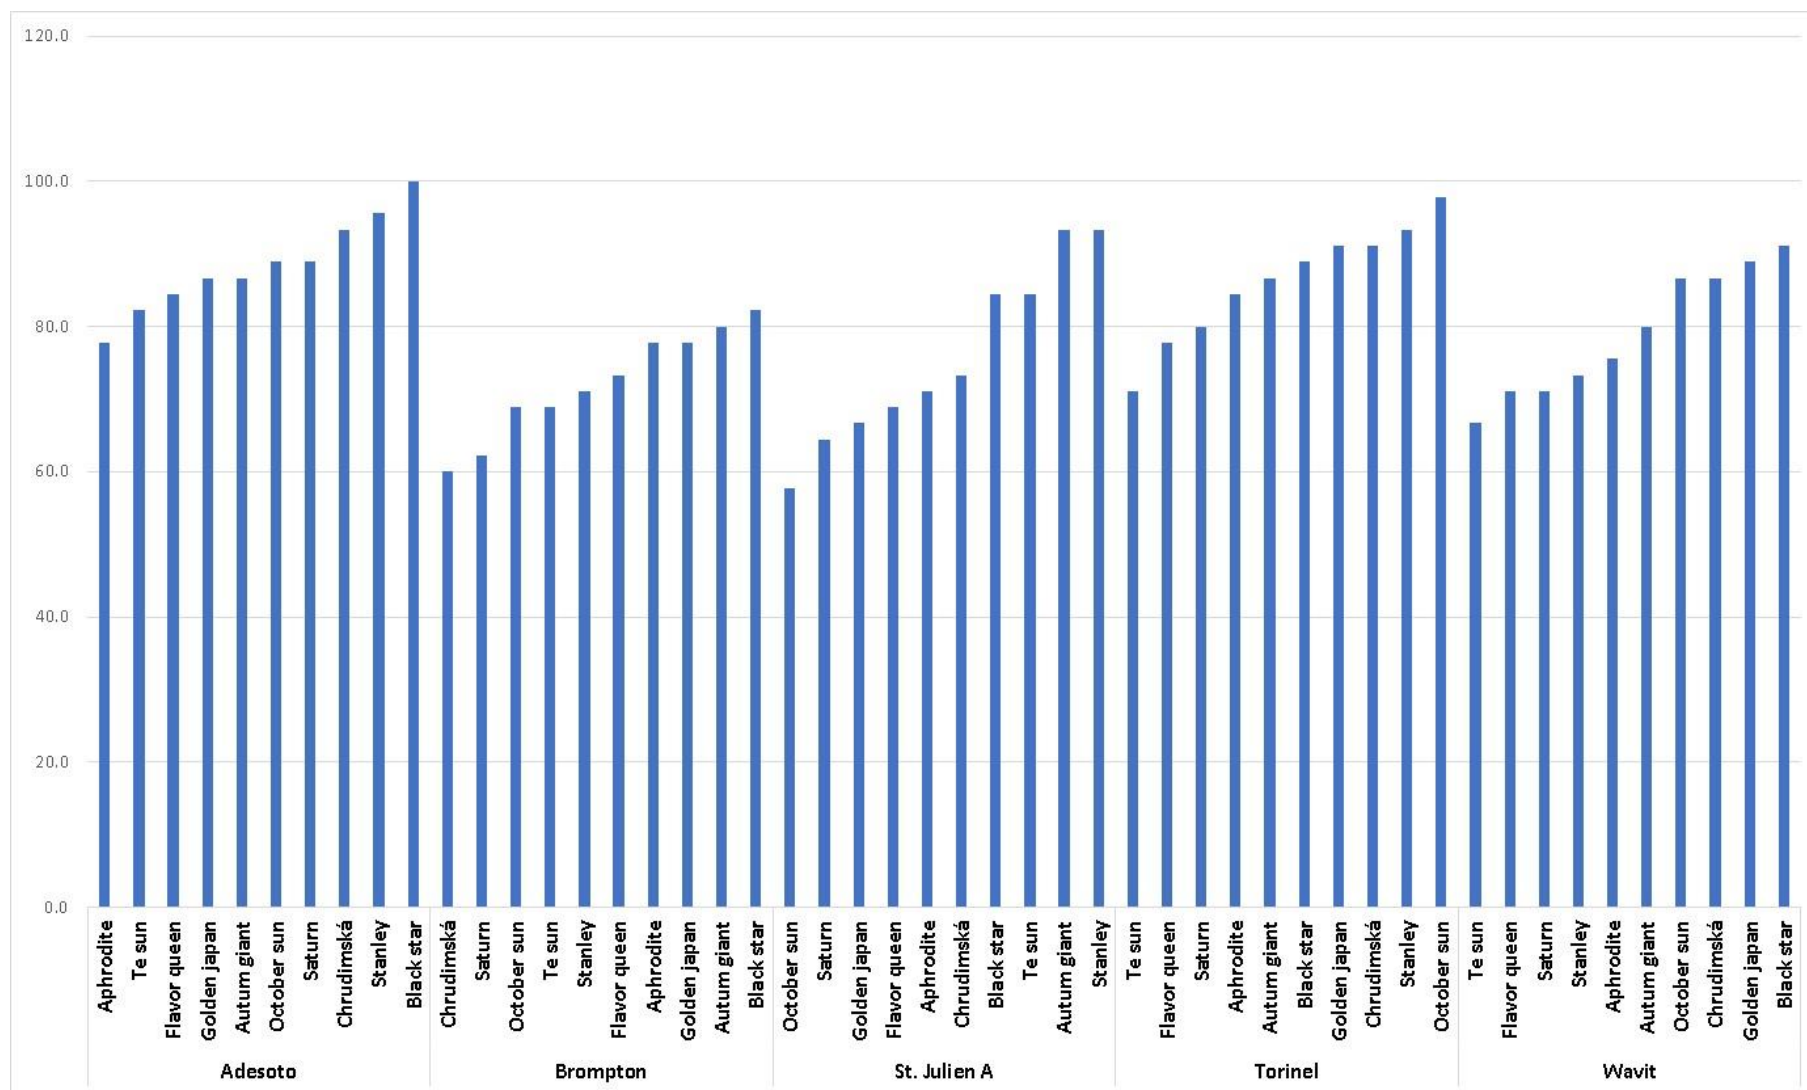

Figure S6: mean yield of saplings (%) values across all rootstock/variety combinations
